# Supplementary material
Source: PubMed Central journal article supplement (PMC8092156)
Supplement: JB.00009-21-s0001.pdf [file JB.00009-21-s0001.pdf]

**Table S1.** Bacterial strains and plasmids used in this study

| Strain or plasmid                                                                                                                                                                                                           | Genotype or description                                                                                                                                                                                                                   | Reference or source |
|-----------------------------------------------------------------------------------------------------------------------------------------------------------------------------------------------------------------------------|-------------------------------------------------------------------------------------------------------------------------------------------------------------------------------------------------------------------------------------------|---------------------|
| <i>E. coli</i>                                                                                                                                                                                                              |                                                                                                                                                                                                                                           |                     |
| DH5 $\alpha$                                                                                                                                                                                                                | F <sup>-</sup> $\Phi$ 80 <i>dlacZ</i> $\Delta$ M15 $\Delta$ ( <i>lacZYA-argF</i> )U169 <i>deoR recA1 endA1 hsdR17</i> (r <sub>K</sub> <sup>-</sup> , m <sub>K</sub> <sup>+</sup> ) <i>phoA supE44</i> $\lambda$ <i>thi-1 gyrA96 relA1</i> |                     |
| BL21(DE3)                                                                                                                                                                                                                   | F <sup>-</sup> <i>ompT hsdS<sub>B</sub></i> (r <sub>B</sub> <sup>-</sup> m <sub>B</sub> <sup>-</sup> ) <i>gal dcm</i> (DE3)                                                                                                               | Novagen             |
| <i>V. alginolyticus</i>                                                                                                                                                                                                     |                                                                                                                                                                                                                                           |                     |
| VIO5                                                                                                                                                                                                                        | VIK4 (Rif <sup>r</sup> Pof <sup>+</sup> Laf <sup>-</sup> )                                                                                                                                                                                | (1)                 |
| LPN1                                                                                                                                                                                                                        | VIO5 $\Delta$ <i>flhF</i> (Rif <sup>r</sup> Pof <sup>+</sup> Laf <sup>-</sup> )                                                                                                                                                           | (2)                 |
| NMB196                                                                                                                                                                                                                      | VIO5 $\Delta$ <i>fliF</i> (Rif <sup>r</sup> Pof <sup>+</sup> Laf <sup>-</sup> )                                                                                                                                                           | (3)                 |
| <u>Plasmids</u>                                                                                                                                                                                                             |                                                                                                                                                                                                                                           |                     |
| pCold I                                                                                                                                                                                                                     | Amp <sup>r</sup> , P <sub>cspA</sub>                                                                                                                                                                                                      | Takara              |
| pMMB206                                                                                                                                                                                                                     | Cm <sup>r</sup> , P <sub>tac</sub> P <sub>lac</sub> UV5                                                                                                                                                                                   | (4)                 |
| pBAD33                                                                                                                                                                                                                      | Cm <sup>r</sup> , P <sub>BAD</sub>                                                                                                                                                                                                        | (5)                 |
| pTY60                                                                                                                                                                                                                       | Km <sup>r</sup> , P <sub>BAD</sub>                                                                                                                                                                                                        | (6)                 |
| pTY57                                                                                                                                                                                                                       | Cm <sup>r</sup> , P <sub>BAD</sub>                                                                                                                                                                                                        | (7)                 |
| pRO101                                                                                                                                                                                                                      | pCold I- <i>his-fliF</i>                                                                                                                                                                                                                  | (8)                 |
| pRO101- $\Delta$ N30                                                                                                                                                                                                        | pRO101- <i>his-fliF</i> (31-580)                                                                                                                                                                                                          | This study          |
| pRO101- $\Delta$ N50                                                                                                                                                                                                        | pRO101- <i>his-fliF</i> (51-580)                                                                                                                                                                                                          | This study          |
| pRO101- $\Delta$ C83                                                                                                                                                                                                        | pRO101- <i>his-fliF</i> (1-497)                                                                                                                                                                                                           | This study          |
| pRO101- $\Delta$ C110                                                                                                                                                                                                       | pRO101- <i>his-fliF</i> (1-470)                                                                                                                                                                                                           | This study          |
| pTSK137                                                                                                                                                                                                                     | pCold I- <i>his-fliFG</i>                                                                                                                                                                                                                 | (9)                 |
| pTSK122                                                                                                                                                                                                                     | pMMB206- <i>flhF</i>                                                                                                                                                                                                                      | (9)                 |
| pTY502                                                                                                                                                                                                                      | pTY57- <i>fliF</i>                                                                                                                                                                                                                        | (8)                 |
| pTY502- $\Delta$ N30                                                                                                                                                                                                        | pTY57- <i>fliF</i> (31-580)                                                                                                                                                                                                               | This study          |
| pTY502- $\Delta$ N50                                                                                                                                                                                                        | pTY57- <i>fliF</i> (51-580)                                                                                                                                                                                                               | This study          |
| pTY502- $\Delta$ C83                                                                                                                                                                                                        | pTY57- <i>fliF</i> (1-497)                                                                                                                                                                                                                | This study          |
| pTY502- $\Delta$ C110                                                                                                                                                                                                       | pTY57- <i>fliF</i> (1-470)                                                                                                                                                                                                                | This study          |
| pHHT103                                                                                                                                                                                                                     | pBAD33- <i>his-fliF</i>                                                                                                                                                                                                                   | (9)                 |
| pHHT103- $\Delta$ N30                                                                                                                                                                                                       | pBAD33- <i>his-fliF</i> (31-580)                                                                                                                                                                                                          | This study          |
| pHHT103- $\Delta$ N50                                                                                                                                                                                                       | pBAD33- <i>his-fliF</i> (51-580)                                                                                                                                                                                                          | This study          |
| pYI101                                                                                                                                                                                                                      | pTY60- <i>fliF-egfp</i>                                                                                                                                                                                                                   | (9)                 |
| pYI101- $\Delta$ N30                                                                                                                                                                                                        | pTY60- <i>fliF</i> ( $\Delta$ 2-30)- <i>egfp</i>                                                                                                                                                                                          | This study          |
| pYI101- $\Delta$ N50                                                                                                                                                                                                        | pTY60- <i>fliF</i> ( $\Delta$ 2-50)- <i>egfp</i>                                                                                                                                                                                          | This study          |
| Amp <sup>r</sup> , ampicillin-resistant; Cm <sup>r</sup> , chloramphenicol-resistant; Rif <sup>r</sup> , Rifampicin-resistant; Pof <sup>+</sup> , possessing a polar flagellum; Laf <sup>-</sup> , lack of lateral flagella |                                                                                                                                                                                                                                           |                     |

## References

1. Okunishi I, Kawagishi I, Homma M. 1996. Cloning and characterization of *motY*, a gene coding for a component of the sodium-driven flagellar motor in *Vibrio alginolyticus*. *J Bacteriol* 178:2409-2415.
2. Kusumoto A, Shinohara A, Terashima H, Kojima S, Yakushi T, Homma M. 2008. Collaboration of FlhF and FlhG to regulate polar-flagella number and localization in *Vibrio alginolyticus*. *Microbiology* 154:1390-1399.
3. Yorimitsu T, Sato K, Asai Y, Kawagishi I, Homma M. 1999. Functional interaction between PomA and PomB, the Na<sup>+</sup>-driven flagellar motor components of *Vibrio alginolyticus*. *J Bacteriol* 181:5103-5106.
4. Morales BM, Backman A, Bagdasarian M. 1991. A series of wide-host-range low-copy-number vectors that allow direct screening for recombinants. *Gene* 97:39-47.
5. Guzman LM, Belin D, Carson MJ, Beckwith J. 1995. Tight regulation, modulation, and high-level expression by vectors containing the arabinose pBAD promoter. *J Bacteriol* 177:4121-4130.
6. Kojima S, Nonoyama N, Takekawa N, Fukuoka H, Homma M. 2011. Mutations targeting the C-terminal domain of FliG can disrupt motor assembly in the Na<sup>+</sup>-driven flagella of *Vibrio alginolyticus*. *J Mol Biol* 414:62-74.
7. Li N, Kojima S, Homma M. 2011. Characterization of the periplasmic region of PomB, a Na<sup>+</sup>-driven flagellar stator protein in *Vibrio alginolyticus*. *J Bacteriol* 193:3773-3784.
8. Ogawa R, Abe-Yoshizumi R, Kishi T, Homma M, Kojima S. 2015. Interaction of the C-Terminal Tail of FliF with FliG from the Na<sup>+</sup>-Driven Flagellar Motor of *Vibrio alginolyticus*. *J Bacteriol* 197:63-72.
9. Terashima H, Hirano K, Inoue Y, Tokano T, Kawamoto A, Kato T, Yamaguchi E, Namba K, Uchihashi T, Kojima S, Homma M. 2020. Assembly mechanism of a supramolecular MS-ring complex to initiate bacterial flagellar biogenesis in *Vibrio* species. *J Bacteriol* 202:e00236-20.

```

1 MADKSTDLTVTEGGSDGALVASSDVDVESQNPdleERSASKFDMAVGDLDLLRQVVLVLS
1 -----MSATASTATQPKPLEWLNRLRANPRIPLIVA

61 ISICVALIVMLFFWVKEPEMRPL-GAYETEELIPVLDYLDQKINNYKL--DGNTISVLESS
32 GSAAVAIVVAMVLWAKTPDYRTLFSNLSQDGGAIVAQLTQMNIPYRFANGSGAIEVPAD

118 EYNSIKLGMVRSQVNVQATEAGDDILLQDMGFGVSRLEQERLKLsrERQLAQATEEMKQV
92 KVHELRLRLAQQLPKGGAVGFE-LLDQEKFGISQFSEQVNYQRALEGE LARTIETLGPV

178 RKARVLLALPKHSVFVRHNQEAASASVFLTLSTGTNLKQQEVDSIVDMVASAVPGMKTsRI
151 KSARVHLAMPKPSL FVREQKSP SASVTVTLEPGRALDEGQISAVVHLVSSAVAGLPPGNV

238 TVTDQHGRLLSSGSQDPASAARRKEQELERSQEALREKIDSVLLPILGYGNYTAQVDIQ
211 TLVDQSGHLLTQ-SNTSGRDLNDAQLKFANDVESRIQRRIEAILSPIVGNNGNVHAQVTAQ

298 MDFSAVEQTRKRFPNTPATRSEY-----ALEDYNNGNMVAGIPGALSNOQ--PADASI-
270 LDFANKEQTEEHYSPNGDASKATLRSRQLNISEQVGAGYGGVPGALSNOQAPPNEAPIA

350 -----PDVAQMK---DGSVMGQGSVRKESTRNFELDTTISHERKQTGTVARQTVSV
330 TPPTNQNAQNTPTSTSTNSNSAGPRSTQRNETSNYEVDRTIRHTKMNVGDIERLSVAV

399 AIKDRRQVNPDTGEVTTYTPMSESEINATRQVLIGTVGFDQGRGDLNVLsvKF AEPEAEQ
390 VV-----NYKTLADGKPLPLTADQMKQIEDLTREAMGFSDKRGDTLNVVNSPFSAVDNTG

459 LEEPPIWEHPNFSQWVRFASALVIVVVLVLRPAMKKLINPTSDDEDEMYGPDGLPIG
445 -GELPFWQQQSFIDQLLAAGRWLLVLYVAWILWRKAVRPQLTRRVEEAKA--AQEQAVR

519 ADGETSLIGSDIESSLFEFGSSIDLPNLHKDEdVlKAVRALVANEPelAAQVVKNWmND
502 QETEEA-VEVRLSKDE--QLQQRANRQLG-AEVMSQRIREMSDNDPRVVALVIRQWMSN

579 NG-
558 DHE

```

**Fig. S1.** Comparison of amino acid sequences of *Salmonella* FliF and *Vibrio* FliF. Amino acid sequence homology is about 27%. The red frames indicate transmembrane regions. Arrows indicate mutation sites.

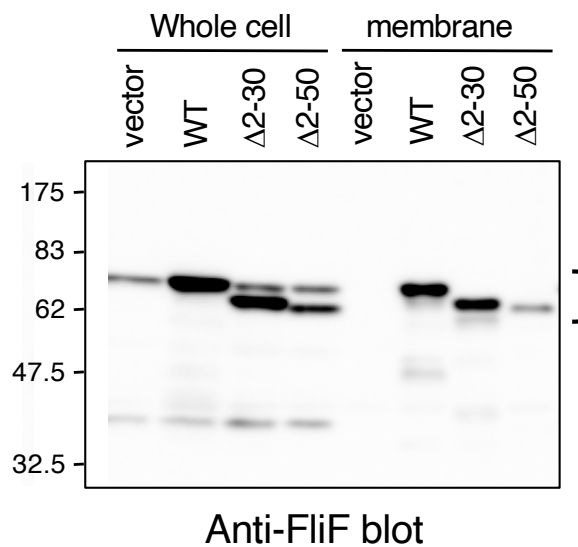

**Fig. S2.** Detection of N-terminal deletion FliF. The *fliF* deletion mutant (NMB196) producing wild-type FliF,  $\Delta N30$ FliF, or  $\Delta N50$ FliF from the pBAD plasmids was grown to mid-log phase in the presence of 0.02% arabinose and cells were disrupted by sonication. The membrane and the soluble fraction were separated by ultracentrifugation. After separating the proteins from the membrane and the soluble fraction by SDS-PAGE, the FliF protein was detected by immunoblotting with an anti-FliF antibody.



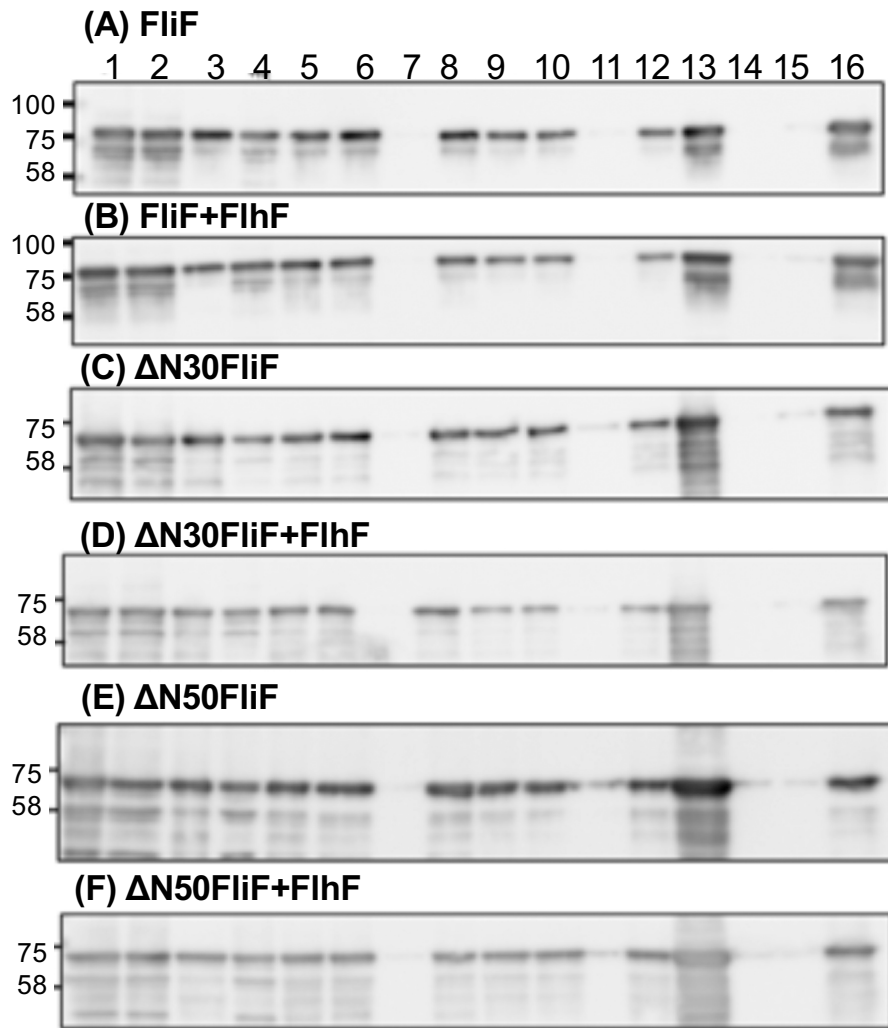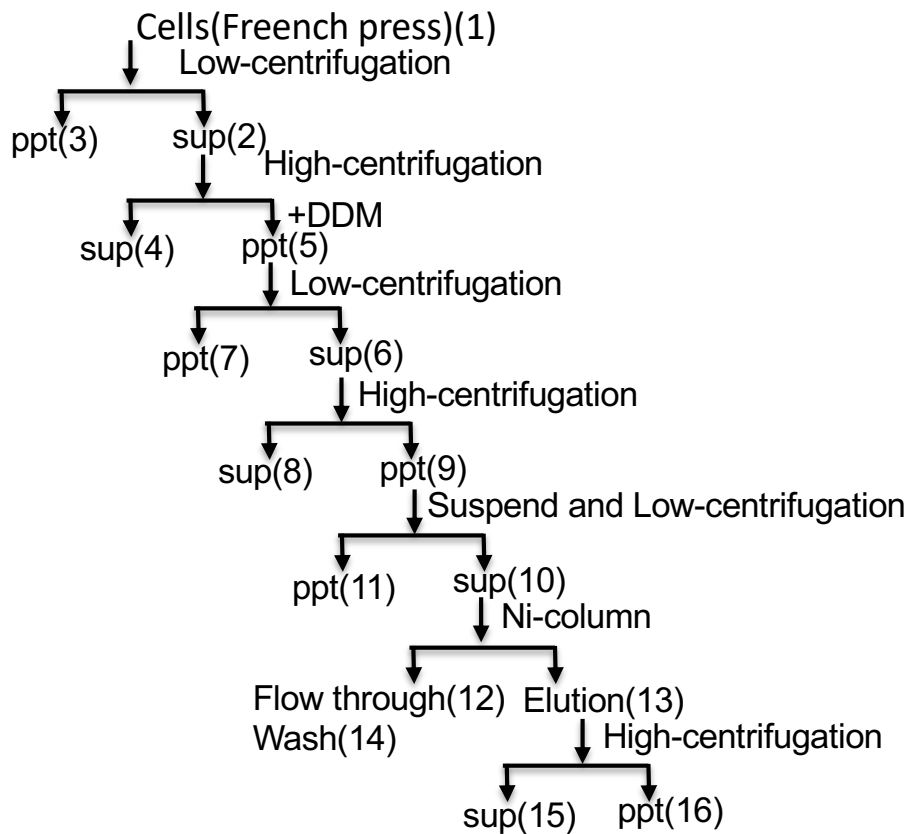

**Fig. S4.** Purification process of MS ring made by N-terminal deleted FliF. *E. coli* BL21 (DE3) cells harboring pRO101 (A), pRO101 and pTSK22 (B), pRO101- $\Delta N30$  (C), pRO101- $\Delta N30$  and pTSK122 (D), pRO101- $\Delta N50$  (E), or pRO101- $\Delta N50$  and pTSK122 (F) were cultured and MS ring was isolated. The purification procedure is described in the bottom of the figure. The samples indicated by number in the procedure were subjected to SDS-PAGE, and the separated FliF protein was detected by immunoblotting with an anti-FliF antibody.

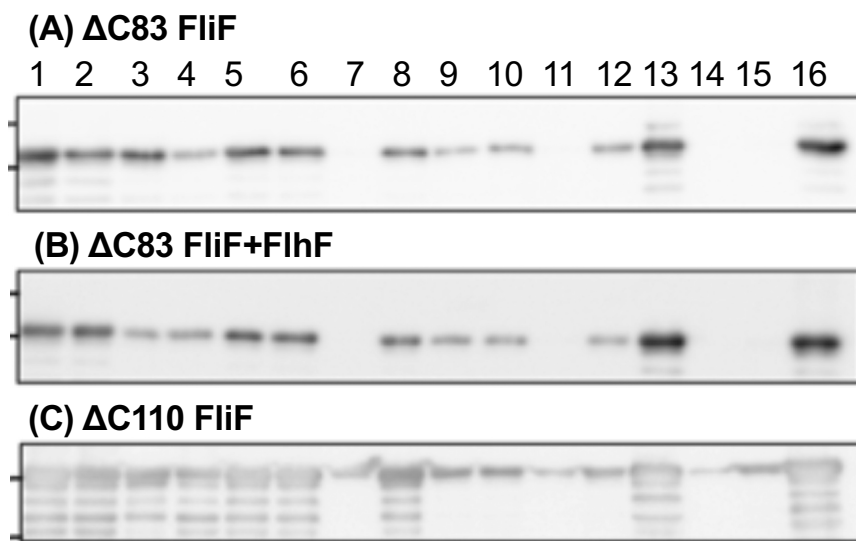

**Fig. S5.** Purification process of MS ring made by C-terminal deleted FliF. *E. coli* BL21 (DE3) cells harboring pRO101- $\Delta C83$  (A), pRO101- $\Delta C83$  and pTSK22 (B), pRO101- $\Delta C110$  (C) were cultured and MS ring was isolated as Fig. S4. The samples indicated by number in the procedure described in Fig. S4 were subjected to SDS-PAGE, and the separated FliF protein was detected by immunoblotting with an anti-FliF antibody.
